# Supplementary material
Source: PubMed Central journal article supplement (PMC5553033)
Supplement: JB.00177-17_zjb999094508s1.pdf [file JB.00177-17_zjb999094508s1.pdf]

## SUPPLEMENTAL MATERIAL Mao and Grogan, 2017

### This document:

Figure S1. Phenotypic revertants of strain GB8-9

Table S1. Nutritional supplementation of strain GB8-9

Table S2. Spontaneous *pyrE* mutations of wild-type and GB8 strains

Table S3. Sequence differences not analyzed as polymorphisms

### Associated data files:

File S1. Polymorphisms of the global set of strains (three genomes)

File S2. Polymorphisms of the local set of strains (five genomes)

File S3. Comparison of induced mutations vs. polymorphic sites

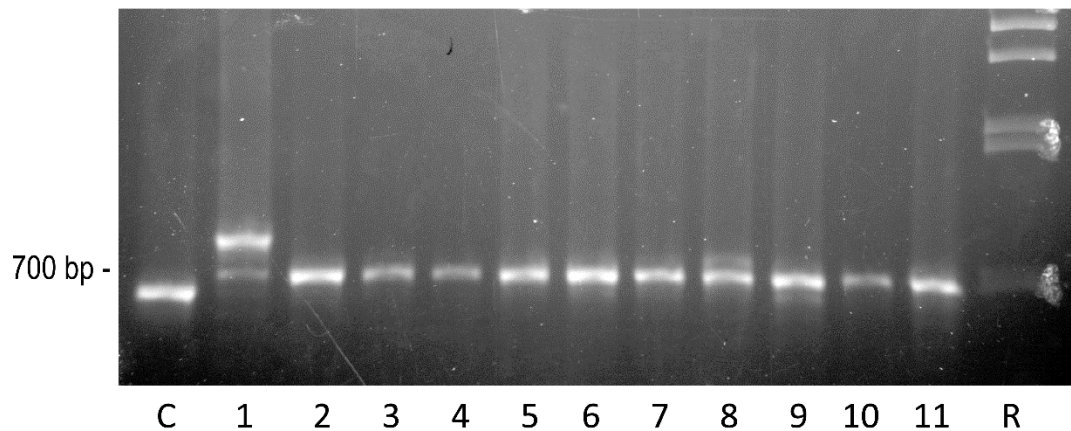

FIGURE S1. Phenotypic revertants of strain GB8-9

Gel shows PCR products that span the tandemly repeated SR unit of strain DG185 (lane C, 5x allele), clones of GB8-9 selected as phenotypic revertants (lanes 1-11), and reference markers (lane R). All phenotypic revertants show the contracted (6x) allele of this TR (co-migrating with the 700 bp marker); culture 1 also retained cells with the original 7x allele of GB8-9 (see Fig. 2).

Table S1. Nutritional supplementation of strain GB8-9<sup>a</sup>

| <u>Supplement</u> <sup>b</sup> | <u>Relative growth response</u> |
|--------------------------------|---------------------------------|
| C+D                            | +                               |
| D+P                            | +                               |
| D+V                            | +                               |
| I+V                            | +                               |
| AE+K+S                         | +                               |
| R+H+M+R                        | 0                               |
| D+I+F+Y                        | 0                               |
| C+L+P+V                        | 0                               |
| A+R+D+C                        | 0                               |
| E+H+I+L                        | 0                               |
| K+M+F+P                        | +                               |
| S+T+Y+V                        | ++                              |
| acid-hydrolyzed                |                                 |
| casein                         | +++                             |
| DIFY+CLPV                      | +                               |
| EHIL+KMFP                      | ++                              |

<sup>a</sup>Maximal growth of strain GB8-9 in defined medium had been observed previously to be supported by a pool of amino acids (Bell GD. 2001. “Genetic Diversity of Natural *Sulfolobus* Populations and Mutator Mutants of *Sulfolobus acidocaldarius*”. *Thesis, M S*). We conducted additional growth tests with pure amino acids (see Materials and Methods), and found that the growth increase tended to increase with the complexity of the mixture added, and none of the defined mixtures tested was as effective as acid-hydrolyzed casein. Although the metabolic basis of this dependence remains to be defined, it is consistent with the criterion used initially to isolate strain GB8-9, namely, dependence on supplementation of defined medium with 0.05% yeast extract (see Results).

<sup>b</sup>Amino acids (listed by single-letter abbreviations) were added to chemically defined liquid medium containing only ammonium sulfate as N source (see Materials and Methods).

<sup>c</sup>Growth was measured turbidometrically, relative to an unsupplemented control. Other binary combinations of pure amino acids yielded no detectable growth stimulation, and certain amino acids seemed to counteract the growth-stimulating effects of others (not listed). Symbols: 0, no net increase in cell density; +, increase of approximately  $5 \times 10^7$  cells/mL

Table S2. Spontaneous *pyrE* mutations of wild-type and GB8 strains<sup>a</sup>

| <u>Type of Event</u> | <u>Number</u> |            | <u>Percent of total</u> |            |
|----------------------|---------------|------------|-------------------------|------------|
|                      | <u>WT</u>     | <u>GB8</u> | <u>WT</u>               | <u>GB8</u> |
| +A                   | 6             | 6          | 6.1                     | 8.3        |
| -A                   | 53            | 27         | 53.5                    | 37.5       |
| A -> G               | 0             | 1          | --                      | 1.4        |
| A -> T               | 2             | 2          | 2.0                     | 2.8        |
| +C                   | 0             | 2          | --                      | 2.8        |
| -C                   | 1             | 0          | 1.0                     | --         |
| C -> G               | 1             | 0          | 1.0                     | --         |
| C -> T               | 2             | 0          | 2.0                     | --         |
| +G                   | 5             | 11         | 5.1                     | 15.3       |
| -G                   | 8             | 2          | 8.1                     | 2.8        |
| G -> A               | 6             | 5          | 6.1                     | 6.9        |
| +T                   | 4             | 3          | 4.0                     | 4.2        |
| -T                   | 0             | 2          | --                      | 2.8        |
| T -> A               | 1             | 4          | 1.0                     | 5.6        |
| T -> C               | 1             | 0          | 1.0                     | --         |
| deletion             | 1             | 1          | 1.0                     | 1.4        |
| triplet expansion    | 3             | 0          | 3.0                     | --         |
| TD                   | 5             | 5          | 5.1                     | 6.9        |
| transposition        | 0             | 1          | --                      | 1.4        |

<sup>a</sup>Seventy-two independent spontaneous FOA-resistant mutants were selected, and the *pyrE* mutation in each was identified by sequencing. The resulting spectrum of mutations resembled that of wildtype *S. acidocaldarius* in most respects; in particular G:C to A:T transitions were not elevated relative to wild-type.

Table S3. Sequence differences not analyzed as polymorphisms<sup>a</sup>

| <u>Position</u> | <u>Base</u> | <u>Observed<sup>b</sup></u> | <u>Predicted impact of correction</u>  |
|-----------------|-------------|-----------------------------|----------------------------------------|
| 201457          |             | A added                     | converts 152aa ORF to 145aa ORF        |
| 224370          | T           | C                           |                                        |
| 359301          |             | T removed                   | extends 149aa ORF to 219aa             |
| 396514          | A           | G                           |                                        |
| 419146          |             | C added                     | negligible effect on ORFs              |
| 542545          |             | A removed                   | converts 70aa ORF to 108aa ORF         |
| 627121          | G           | T                           |                                        |
| 627222          | A           | T                           |                                        |
| 627265          | A           | T                           | removes TAA stop codon                 |
| 628472          |             | AAA > AAAA                  | removes TAG codon, fuses flanking ORFs |
| 673663          |             | A removed                   | removes 192aa ORF                      |
| 700719          | G           | A                           |                                        |
| 863049          |             | T removed                   |                                        |
| 863062          |             | T removed                   |                                        |
| 863069          |             | T removed                   | converts 49aa ORF to 48aa ORF          |
| 963993          |             | T added                     | removes 98aa ORF                       |
| 1095706         | T           | C                           |                                        |
| 1133248         |             | T added                     | removes 53aa ORF                       |
| 1225698         |             | T removed                   | converts 95aa ORF to 185aa ORF         |

|         |   |           |                               |
|---------|---|-----------|-------------------------------|
| 1225967 |   | T added   |                               |
| 1269571 | A | G         |                               |
| 1270078 | C | T         |                               |
| 1271203 | C | T         |                               |
| 1278928 | A | G         |                               |
| 1351450 | C | T         |                               |
| 1755721 | T | C         |                               |
| 1791106 |   | G removed | converts 34aa ORF to 50aa ORF |
| 2002815 |   | C removed | shortens Saci_2168            |

<sup>a</sup> Differences observed between the genome sequence published by Chen et al. () and deposited as CP000077, and independent analysis of DSM 639 or ATCC 33909 (see Materials and Methods)

<sup>b</sup> Refers to the sequence observed in ATCC33909 and all other *S. acidocaldarius* strains examined
